# Supplementary material for: Let-7f-5p suppresses Th17 differentiation via targeting STAT3 in multiple sclerosis
Source: PubMed Central journal article supplement (PMC6660039; doi:10.18632/aging.102093), 2019-07-15
Supplement: aging-11-102093-s002.pdf [file aging-11-102093-s002.pdf]

SUPPLEMENTARY FIGURES

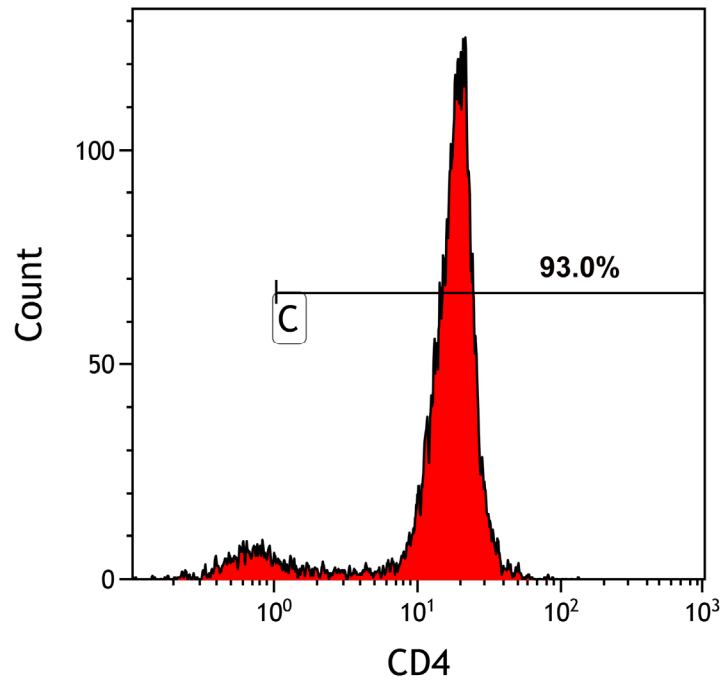

Supplementary Figure 1. The expression of miR-150-5p, miR-423-5p, let-7e-5p of peripheral blood CD4<sup>+</sup> T cells from MS patients and HC.

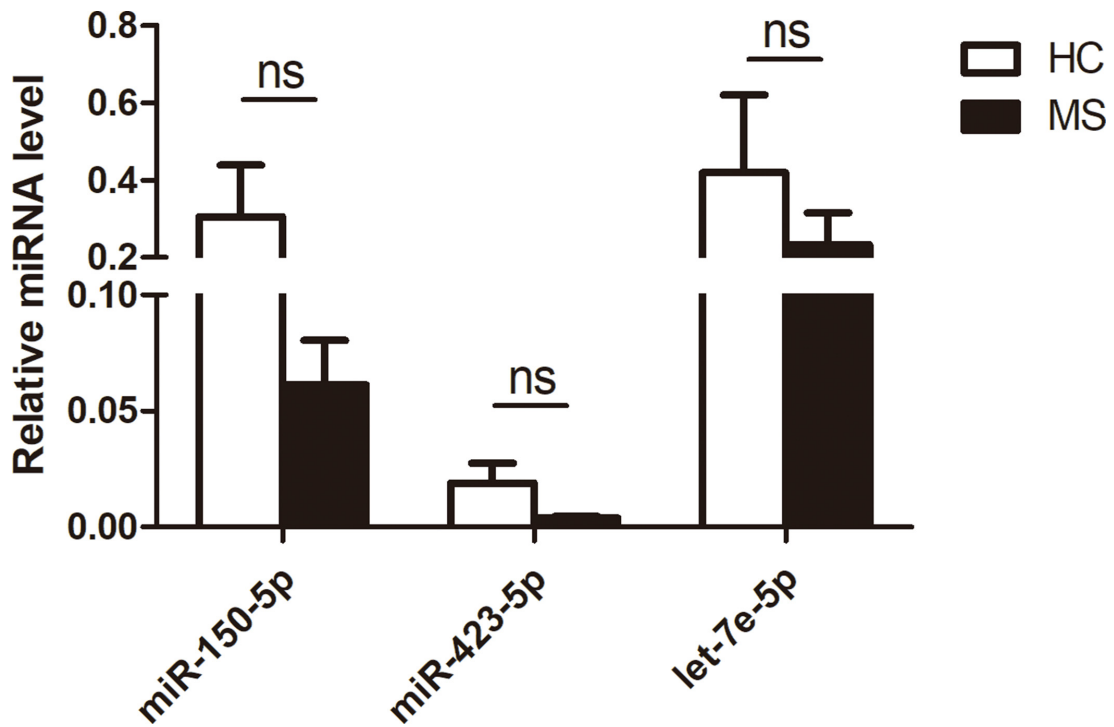

Supplementary Figure 2. The inverse correlations between let-7f-5p and STAT3/p-STAT3 protein levels.

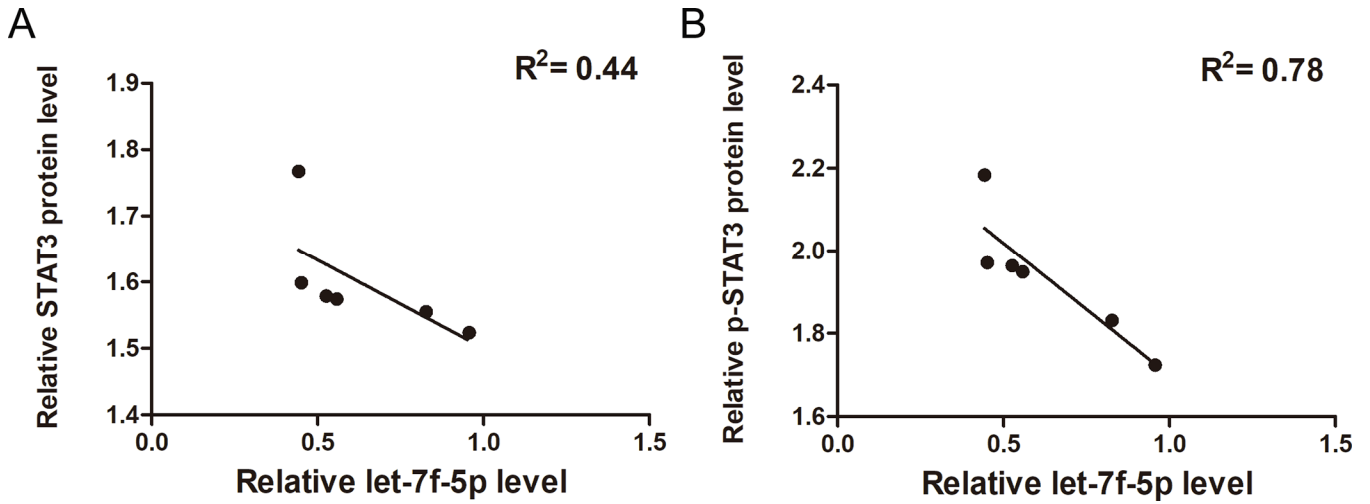

Supplementary Figure 3. The role of let-7f-5p on STAT3 expression and phosphorylation is not specific to IL-6.

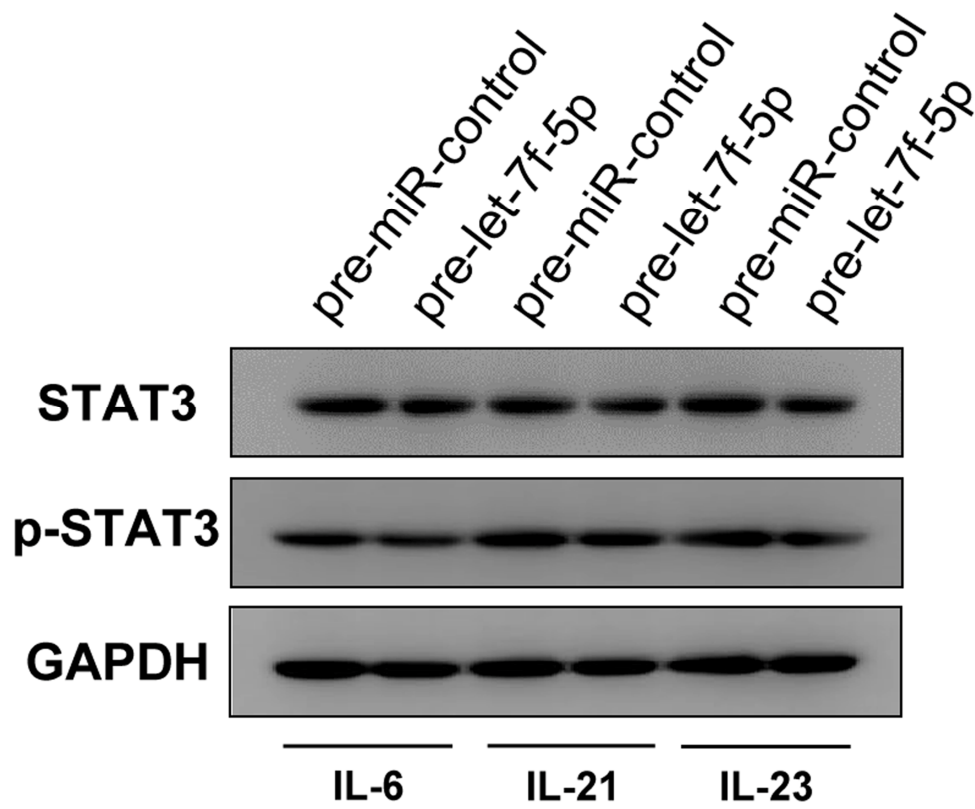

Supplementary Figure 4. Purity of the sorted CD4<sup>+</sup> T cells.
